# Supplementary material for: Linear π-conjugated units of theD∞hpoint group as superior ultraviolet birefringent units
Source: Royal Society of Chemistry journal article supplement (doi:10.1039/d3cp01081c), 2023-01-01
Supplement: d3cp01081c1.pdf [file d3cp01081c1.pdf]

## *Supporting Information*

### **Linear $\pi$ -conjugated units of the $D_{\infty h}$ point group as superior ultraviolet birefringent units**

Rong Yang,<sup>ab</sup> Abudukadi Tudi,<sup>\*ab</sup> Yu Dang,<sup>ab</sup> Kewang Zhang,<sup>ab</sup> and Hongsheng Shi<sup>\*ab</sup>

a. Research Center for Crystal Materials, Key Laboratory of Functional Materials and Devices for Special Environments, Xinjiang Technical Institute of Physics & Chemistry, Chinese Academy of Sciences; Xinjiang Key Laboratory of Electronic Information Materials and Devices, 40–1 South Beijing Road, Urumqi 830011, China.

b. Center of Materials Science and Optoelectronics Engineering, University of Chinese Academy of Sciences, Beijing 100049, China.

\* Corresponding author: shihs@ms.xjb.ac.cn; abdkd@ms.xjb.ac.cn

## Calculations details

The electronic structures and optical properties were obtained on the basis of ab initio calculations implemented in the CASTEP package through density functional theory (DFT).<sup>1</sup> The generalized gradient approximation (GGA)<sup>2</sup> was adopted, and Perdew-Burke-Ernzerhof (PBE)<sup>3</sup> functional was chosen to calculate the exchange-correlation potential, with an energy cutoff of 750 eV. The numerical integration of the Brillouin zone was performed using a  $3 \times 3 \times 2$  Monkhorst-Pack  $k$ -point sampling. Norm-conserving pseudopotentials were used with the following valence electron configurations: Li-2s<sup>1</sup>, Na-2s<sup>2</sup>2p<sup>6</sup>3s<sup>1</sup>, Si-3s<sup>2</sup>3p<sup>2</sup>, C-2s<sup>2</sup>2p<sup>2</sup>, N-2s<sup>2</sup>2p<sup>3</sup>, B-2s<sup>2</sup>2p<sup>1</sup>, O-2s<sup>2</sup>2p<sup>4</sup> and F-2s<sup>2</sup>2p<sup>5</sup>. In addition, B3LYP (Becke, three-parameter, Lee-Yang-Parr) exchange-correlation functional with the Lee-Yang-Parr correlation functional at the 6-311G basis set in Gaussian was employed to calculate the groups.

**Table S1** Performances of (BO<sub>2</sub>)- and (BO<sub>3</sub>)<sup>3-</sup>anions

|                                                   | BO <sub>2</sub> | BO <sub>3</sub> |
|---------------------------------------------------|-----------------|-----------------|
| Polarizability anisotropy                         | 9.2             | 8.3             |
| HOMO-LUMO gap                                     | 14.4            | 7               |
| Type of hybrid orbitals of B atom in ground state | sp              | sp <sup>2</sup> |
| Theoretical bond angle of<br>O-B-O (°)            | 180             | 120             |

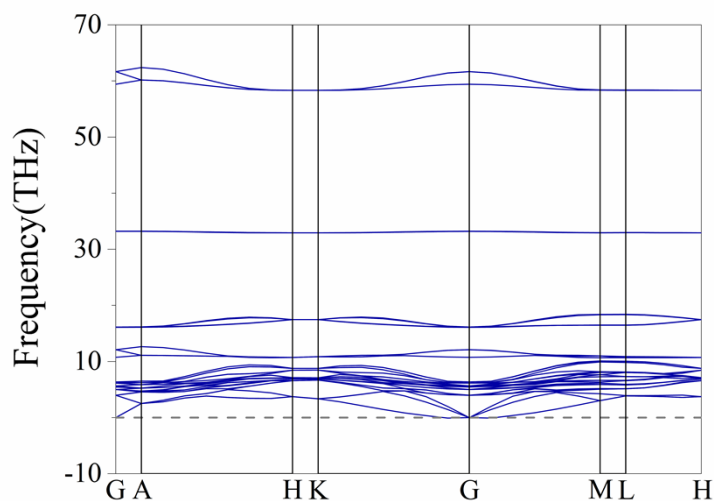

**Figure S1** Calculated phonon dispersion curves of NaBO<sub>2</sub>.

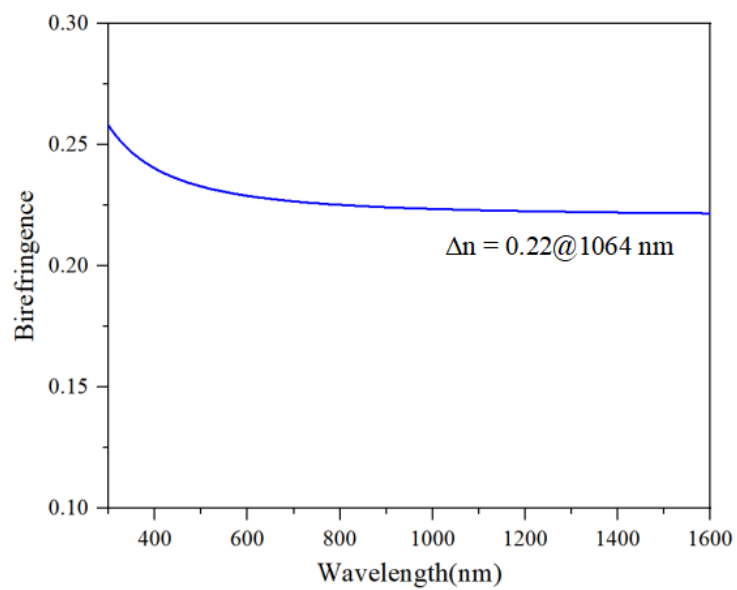

**Figure S2** Calculated birefringence dispersion curves of NaBO<sub>2</sub>

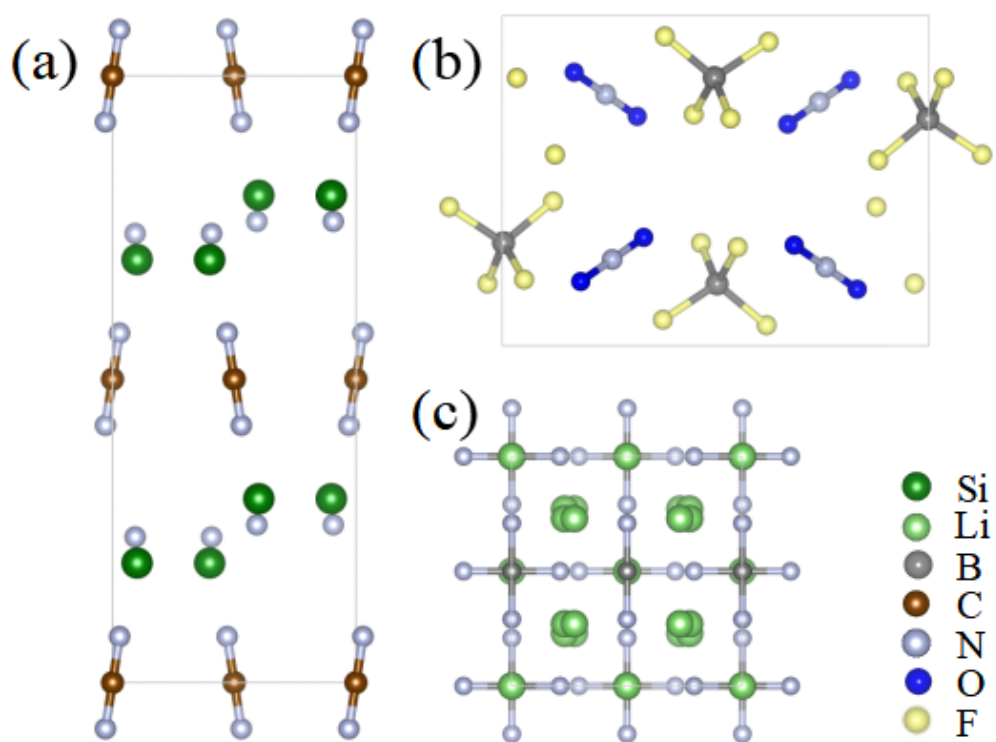

**Figure S3** Crystal structure of (a) Si<sub>2</sub>CN<sub>4</sub>, (b) BF<sub>4</sub>NO<sub>2</sub>, and (c) Li<sub>3</sub>BN<sub>2</sub>

## References

- 1 S. J. Clark, M. D. Segall, C. J. Pickard, P. J. Hasnip, M. I. J. Probert, K. Refson, M. C. Payne, *Z. Kristallogr. - Cryst. Mater.* 2005, **220**, 567-572.
- 2 Perdew, J. P.; Burke, K.; Ernzerhof, M. *Phys. Rev. Lett.* 1996, **77**, 3865.
- 3 Rappe, A.; Rabe, K.; Kaxiras, E.; Joannopoulos, J. D. *Phys. Rev. B* **1990**, **41**, 1227.
